# Supplementary material
Source: PubMed Central journal article supplement (PMC1287864)
Supplement: eukcell_4_11_1902__1.pdf [file eukcell_4_11_1902__1.pdf]

## Supplemental material.

**Generation of deletion constructs.** Gene deletions were generated as described in Davidson et al. (2002) and Gerik et al (2005). As an example, the *chs2* deletion construct was made by overlap PCR and fused together the 5' region of *CHS2* including 1017 bps of coding sequence (made by PCR using primers 1-CHS2 and 4-CHS2), the hygromycin cassette (Hua *et al.*, 2000) utilizing primers 3-CHS2 and 6-CHS2, and the 3' region of *CHS2* including 1075 bps of coding sequence (made by PCR using primers 5-CHS2 and 2-CHS2). This fusion resulted in the deletion of 2769 bps of the *CHS2* gene. All other deletion constructs were made in a similar manner as *chs2*Δ. Primer sequences are listed in Table 1 of the supplemental material. These linear constructs were biolistically transformed into *C. neoformans* H99.

**PCR analysis of transformants.** A three primer PCR screen was used to prove homologous integration on both the 5' and 3' ends of all of the deletion constructs (Nelson *et al.*, 2003). An example of this screen is the 5' end of the *chs2* deletion construct. Three PCR primers that corresponded to i) genomic sequence outside the deletion construct (7-CHS2), ii) genomic sequence from the deleted portion of the gene (9-CHS2), and iii) the HYG selectable marker cassette (Cn-actin7; TCCTCTCCTCCGACAACC) were used in a PCR reaction together. If the wild-type gene was present, a 1271 bp PCR product was made from the 7-CHS2 and 9-CHS2 primers, and if a homologous recombination event occurred, an approximately 200 bp larger PCR product from the 7-CHS2 and Cn-actin7 primers was synthesized. In this manner, homologous recombinants were distinguished from wild-type. Integration at the 3' end of the deletions was identified in the same manner using primers 8-CHS2, 10-CHS2 and Gal7-terminator50 (TGTCGGAATGGACGATCGACC). A PCR screen using primers 7-CHS2 and 8-CHS2, which were made to regions flanking recombination, amplified the entire region spanning the insertions. The wild-type construct was 5344 bp and the homologous recombinants were 5171 bp, demonstrating that a single copy of the transforming DNA had been inserted at the *CHS2* locus. A similar strategy was used to screen for all deletions that inserted the Hygromycin resistance cassette using primers 7-geneX, 9-geneX, and Cn-actin7 for the 5' screen, primers 8-geneX, 10-geneX and Gal7-

terminator50 for the 3' screen, and primers 7-geneX and 8-geneX for the full-length screen. For deletions containing the NAT resistance cassette, NAT-3 (AACGCCGTTGAATCCTCAGG) and Cn-actin7 primers were used in place of Cn-actin7 and Gal7-terminator50, respectively, in the triplex PCR screening for the 5' and 3' ends.

Supplemental Table 1.

| <b>Gene</b> | <b>primer #<sup>1</sup></b> | <b>primer sequence</b>                       |
|-------------|-----------------------------|----------------------------------------------|
| <b>CHS1</b> | 1                           | AAGGTGAAGGTGCGGATGTA CT CGCTTC               |
|             | 2                           | GTACGATGCTCGACGCGAATGTTTCAGT                 |
|             | 3                           | TCAACCAACCATCCCGCCcaggaaacagctatgaccatg      |
|             | 4                           | catggtcatagctgtttcctgGGGCGGGATGTGGTTGGTTGA   |
|             | 5                           | cactggccgctgttttacaacTCGGCGGGGTCAGTACTCCGTTT |
|             | 6                           | AAACGGAGTACTGACCCCGCCGAgttgtaaaacgacggccagtg |
|             | 7                           | GATGAATGGGAACGGGAAAAAGAAGCAG                 |
|             | 8                           | GCCTGAGACAAAACCTGACCCAACGAAT                 |
|             | 9                           | GCGACGTGTCGTT CAGGTCGAG                      |
|             | 10                          | TGGGCGAGGAGCGAGTATGACA                       |
|             | 11                          | TGGTAGGGTTTGTGACGATGG                        |
|             | 12                          | ATGAGTGGGGCATTGGGTAAG                        |
| <b>CHS2</b> | 1                           | AGGACAGAGTGAGCGAATGAC                        |
|             | 2                           | CCAAAATAACCCGGTTAAGC                         |
|             | 3                           | GAAAGAATGGGGCGTCCGATCcaggaaacagctatgaccatg   |
|             | 4                           | catggtcatagctgtttcctgGATCCGACGCCCCATTCTTTC   |
|             | 5                           | cactggccgctgttttacaacGTA CT ATGTTAAGCCACATCG |
|             | 6                           | CGATGTGGCTTAACATAGTACgttgtaaaacgacggccagtg   |
|             | 7                           | AGACCATTTACGCTTGGTCC                         |
|             | 8                           | GACTCATA CATGGTCATGCC                        |
|             | 9                           | ACAGGTGGTATCGTAGTAACC                        |
|             | 10                          | GCTCGACTTTCAATCCTTACC                        |
|             | 11                          | ATGTATGGCCGACCCAGTCCT                        |
|             | 12                          | TCACTCGCCTCTCGAGCAACT                        |
| <b>CHS3</b> | 1                           | CATCACGTGCCCTCGGCGTCCGGCTATCC                |
|             | 2                           | AACAAACATTTAATACTGGGGAGGCGCC                 |
|             | 3                           | GGACCCAAGAATTGCTGGATcaggaaacagctatgaccatg    |
|             | 4                           | catggtcatagctgtttcctgATCCAGCAATTCTTGGGTCC    |
|             | 5                           | cactggccgctgttttacaacTGATTCTCCGGCATAATTCC    |
|             | 6                           | GGAATATGCCGGAAGAATCAgttgtaaaacgacggccagtg    |

7 TCTCCACCCGACCGCTTTCCCATCAACC  
8 CCTAGATACTCTTATGTCCCTTGATCC  
9 CGATACCGATCTTTTCTCTCC  
10 GTGTATCTGATCTCACTTCCC  
11 GCGGTCCGTTTCATTACCTTC  
12 TATGGGCAGGAGGACCAAGTT

**CHS4**

1 GCATGGAGGAGGAGGTGCAGAGATGTAA  
2 TGTGTCAAAAATCCGTGGTGAGGAGACA  
3 GTTCGCAAGCACCGTTTCATCGCcaggaaacagctatgaccatg  
4 catggtcatagctgtttcctgGCGATGAAACGGTGCTTGCGAAC  
5 cactggccgctgttttacaacCGCACCCCCACTCTATCCGTTCA  
6 TGAACGGATAGAGTGGGGGTGCGgttgtaaaacgacggccagtg  
7 TTGGTGAGTCCAAGTTTCTGACTTCCAG  
8 GGTGGCAAAAAGTCCTTTCCATATGAGG  
9 TGTCTGGCGCTGATCTCTGATCG  
10 TGAATGCTTGGGAAGCAGCA  
11 AGCGGGACGTATTTGCTGTTT  
12 AACGGACCCGAAGTATGCACT

**CHS5**

1 TAGGCAGCAGTAACGAGCAGCGAGAAGA  
2 TCATACGTGGCAGCGAGACGGGATATAG  
3 AACACAGTGCAGCGGGCCAACcaggaaacagctatgaccatg  
4 catggtcatagctgtttcctgGTTGGCCCGCTGCACTGTGTT  
5 cactggccgctgttttacaacTGAGAGGAGGGAGGCCATCAA  
6 TTGATGGCCTCCCTCCTCTCAggttgtaaaacgacggccagtg  
7 CACGGTTAAATCAGCAACTCCATCTGCAC  
8 GCACCCAGTACAGAAAGAACGGCTCACC  
9 AGGGTTGGCGAGGCTGACCTGA  
10 TGTGCGAATGCAGAGCTGGACA  
11 AATGCCCATACCCTGTCCAAC  
12 GCGATGTTTTTCATCCCGAAT

**CHS6**

1 GGGGGAGACGAACTATGGAGGGGAGATA  
2 CCCAAGCAGATCAAGGTACATGGTGGAA  
3 TATCACGCAAACCTCCTCCGCGcaggaaacagctatgaccatg  
4 catggtcatagctgtttcctgCGCGGAGGAGGTTTGCCTGATA  
5 cactggccgctgttttacaacTTGACGAGGGTTCCGGCAGTT  
6 AACTGCCGGAACCCTCGTCAAgttgtaaaacgacggccagtg  
7 TCGCGGGAACCTGATGAAATCAGCTGTAG  
8 GGTCAAGCTCCCCCTCCTCCTTATACCA  
9 CGGGGGTGATTGTATGGGAGCA  
10 CGCTGTCAAACGCCCTTCTCG  
11 GGCCCCCTCTTATGACTACCA

12 ATCGAGGGTCGCTGATTGTTT

**CHS7**

1 GTCATCGGTCTACTAGCCCCACCTCTGC  
2 TGCCCCTGTCCCTTCACTATCCTTCCTGT  
3 TGAGTGGGGTCCCTGACCTTCCcaggaaacagctatgaccatg  
4 catggtcatagctgtttcctgGGAAGGTCAGGACCCCCACTCA  
5 cactggccgctgttttacaacGCATGCGTGCGTCTTCGCCTA  
6 TAGGCGAAGACGCACGCATGCgttgtaaaacgacggccagtg  
7 ATGACTTCCTTGGGCTGTAGTGGTAGGG  
8 AGCTGAGGGTCCAAACCTGACTTCTCAT  
9 CTGCGCTGGAAATTGAGGCAGA  
10 TGGGGCGTAAAACCATTGCAAGA  
11 GCCAAATGGCTCAATGACAAG  
12 GTCCAACAGCACGCAAATCTC

**CHS8**

1 CTTCCAGCCTCAGCTGCTTCCTTCTCTC  
2 CGACGACGATACAGGTTTTCTTCGACA  
3 CCATCACATCTTCCACCCAGCAcaggaaacagctatgaccatg  
4 catggtcatagctgtttcctgTGCTGGGGTGGAAAGATGTGATGG  
5 cactggccgctgttttacaacCGTTCGTCTGTTCCGCCGGAGAGT  
6 ACTCTCCGGCGAACAGACGAACGgttgtaaaacgacggccagtg  
7 GTGGCCGCATCTGGTTCCATAATTGTT  
8 TCACTGTTGGGCTCTGCAGTCTCATGTC  
9 GGGGAGGTGAGACGGTCATCAAG  
10 CTGTGGGGCACAATGCTGACG  
11 CACATCTTCCACCCAGCAAC  
12 TTTGCGTCCTATTTTCGCCTGA

**CSR1**

1 CTGCCGAGCAACTCAAGCAGCCAGAACC  
2 ACGTAAGTGCCGATGTCTATCGTTTTCC  
3 CGCCTCTTCTCGATCAATGCCcaggaaacagctatgaccatg  
4 catggtcatagctgtttcctgGGCATTGATCGAGAAGAGGCG  
5 cactggccgctgttttacaacCTGGACTTTCCTGATACGTCC  
6 GGACGTATCAGGAAAGTCCAGgttgtaaaacgacggccagtg  
7 CCCAGCGCCGCTCCCATACGTACGACAG  
8 CGATGACAGTAATTGACAACGGTGACTC  
9 CGCGTGGAAGAAGCGCCAACC  
10 TGC GCGCAGCAGGTATGTACC

**CSR2**

1 ACAGCATTTCGCTGACCTGGAACCTCCT  
2 AGCCCCATCATTACCAAACGACAGAA  
3 ATCAATTCGGCCCCAACTCCCGcaggaaacagctatgaccatg  
4 catggtcatagctgtttcctgCGGGAGTTGGGGCCGAATTGAT  
5 cactggccgctgttttacaacAGCGGTGCAAGTGGGAAGGATG

6 CATCCTTCCCCTTGCACCGCTgttgtaaacgacggccagt  
7 AACATACGTGGCACCTTGCACATCAACA  
8 GGTGAATACCGAACTTCTCCGGACACTG  
9 GCTGACGACACGGCTTCCCCTAT  
10 GATTAGGAGCCGCCAACCTTGC

**CSR3**

1 GAAATCCATCCGTACCCAACCTGCCGAAT  
2 TTTATGCATTGGCCCCTCATTACAACC  
3 ATCCCTCCAGCATCCCCACCCAcaggaaacagctatgaccatg  
4 catggtcatagctgtttcctgTGGGTGGGGATGCTGGAGGGAT  
5 cactggccgctgttttacaacCCTTTCCCAATATCCACCAACGC  
6 GCGTTGGTGGATATTGGGAAAGGttgtaaacgacggccagt  
7 AATTCCAAGGCCGAAGATTTTGCACCTG  
8 TTCAGCTGATCCGGAGTTGGTTGGAATC  
9 GGCGGCGCGTTCGATTGATTC  
10 TGCATGTGATTGCTGGTTGCTGA

1. Primer numbers correspond to the following designations.

Primers 1-10 were used to generate the gene deletion cassette and/or screen the potential deletion mutants as described above. Primers 11 and 12 were used to generate the unique gene-specific fragment that was used as a probe and in positive binding control ladder in the quantitative northern blots.
